# Supplementary material
Source: publisher site journal article supplement (https://static.cambridge.org/content/id/urn:cambridge.org:id:article:S1047951120001018/resource/name/S1047951120001018supp001.pdf)
Supplement: Supplementary file 1 [file S1047951120001018supp001.pdf]

## **Supplemental Figure 1: Cost Difference Calculation**

**Supplemental Figure 2: Decision Tree**—An abbreviated decision tree graphically summarizes the model used to compare data acquisition, cleaning, and linkage under a standard trial design versus a registry-based trial with data accessed at each individual center via a study-specific query.

**Supplemental Figure 3: Summary of Semi-Structured Interview**—Open-ended questions were asked to the following groups of people on the following subjects.

## Supplemental Figure 1: Cost Difference Calculation

Cost difference,  $\Delta_C$ , were defined as follows:

$$\Delta_C = C_{\text{Reg}} - C_{\text{Std}}$$

Where  $C_{\text{Reg}}$  = Costs of the registry-based trial,  
and  $C_{\text{Std}}$  = Costs of running the same trial with manual data collection.

$$C_{\text{Reg}} = C_{\text{Shared}} + C_{\text{FixedReg}} + C_{\text{VarReg}} + C_{\text{AbstReg}}$$

$$C_{\text{Std}} = C_{\text{Shared}} + C_{\text{AbstrStd}}$$

Where  $C_{\text{Shared}}$  = All costs common to both trial types. These costs cancel when  $C_{\text{Std}}$  is subtracted from  $C_{\text{Reg}}$ ,

$C_{\text{FixedReg}}$  = Fixed costs associated with accessing registry data (range includes zero) and cleaning and linking these data,

$C_{\text{VarReg}}$  = Variable costs associated with planning, writing, running, checking, and uploading initial data query,

$C_{\text{AbstReg}}$  = Variable costs associated with the manual abstraction, uploading, cleaning, editing, and linking of data not accessible through the registry,

$C_{\text{AbstrStd}}$  = Variable costs associated with manual abstraction, uploading, cleaning, editing, and linking of all data in the standard clinical trial.

## Supplemental Figure 2: Decision Tree

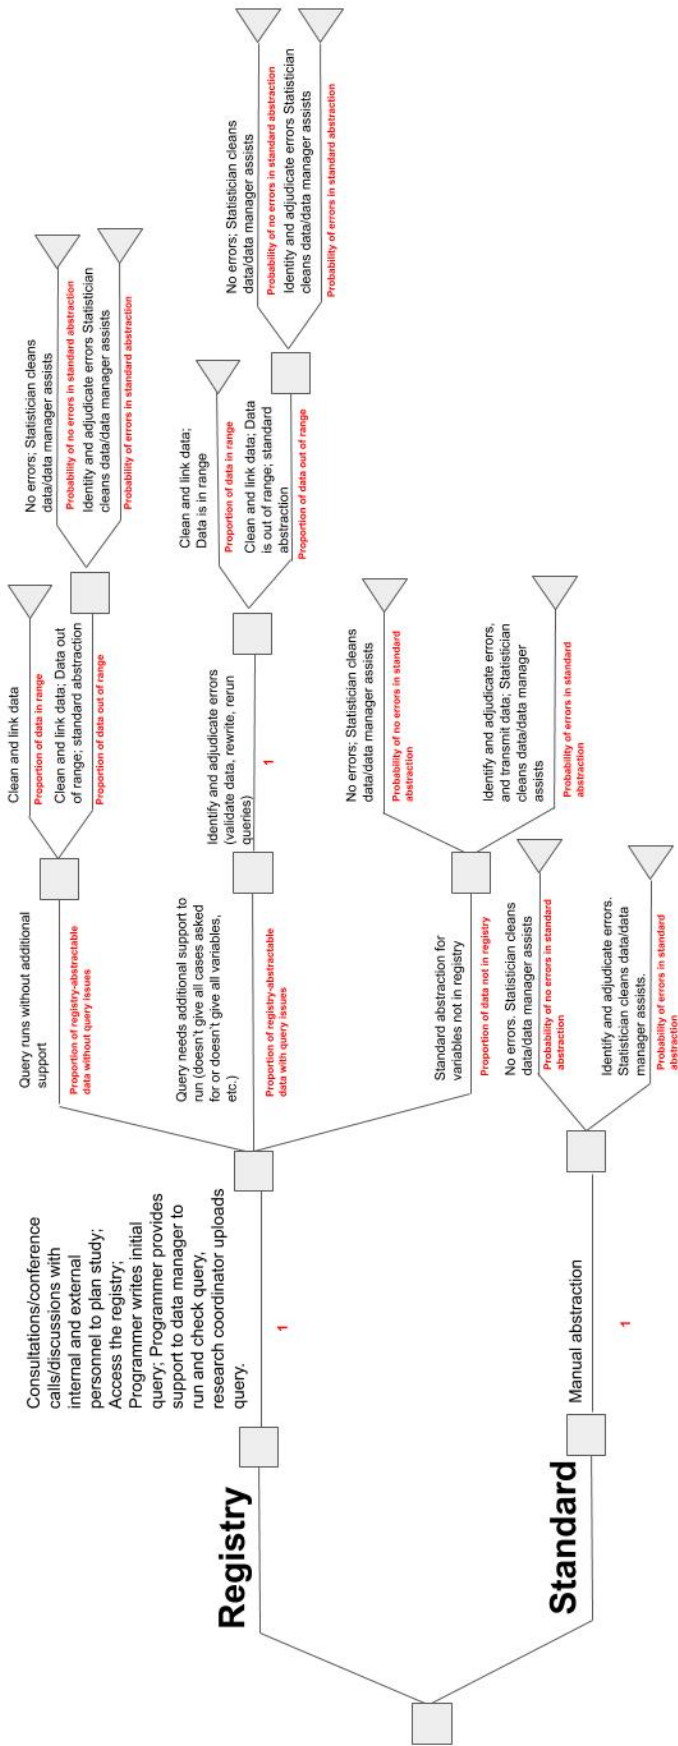

## Supplemental Figure 3: Summary of Semi-Structured Interview

### *Research Coordinators*

- The average time it takes to abstract one variable per patient
- The average time it takes to upload a query
- The percentage of patient charts that had to be revisited in order to adjudicate out of range input errors

### *Data Managers*

- The average time it takes to run a query provided by a programmer in the registry case
- The average time it takes to run and check a query in the standard case
- The average time it takes to clean data in the standard case

### *Statisticians*

- The average time it takes to clean data in the standard case
- The average time it takes to clean and link data in the registry case
- The likelihood that the queried data will be out of range and need to be abstracted again manually

### *Programmers*

- The average time to write the initial query
- The average time to implement the query per center
- The average support time per center
- The likelihood that any one center will need additional query support or a query rewrite
- The average time to edit the query per center
